# Supplementary material for: Hybrid GMP–polyamine hydrogels as new biocompatible materials for drug encapsulation
Source: Royal Society of Chemistry journal article supplement (doi:10.1039/d0sm00704h), 2020-01-01
Supplement: d0sm00704h1.pdf [file d0sm00704h1.pdf]

# ELECTRONIC SUPPLEMENTARY INFORMATION

## Hybrid GMP-polyamine hydrogels as new biocompatible materials for drug encapsulation

Alberto Lopera,<sup>a</sup> Juan A. Aguilar,<sup>b</sup> Raquel Belda,<sup>b</sup> Begoña Verdejo,<sup>a</sup> Jonathan  
W. Steed,<sup>b</sup> and Enrique García-España<sup>a</sup>

<sup>a</sup> *Departamento de Química Inorgánica, Instituto de Ciencia Molecular, Universidad de  
Valencia, Calle Catedrático José Beltrán 2, 46980 Paterna, Valencia (Spain). E-mail:  
alberto.lopera@uv.es, enrique.garcia-es@uv.es*

<sup>b</sup> *Department of Chemistry, Durham University, South Road, DH1 3LE Durham (United  
Kingdom).*

**Figure S1.** Distribution diagram of **L1** as a function of the pH.  $[L1] = 1.0 \cdot 10^{-3}$  M.

**Figure S2.** Distribution diagram of **L2** as a function of the pH.  $[L2] = 1.0 \cdot 10^{-3}$  M.

**Figure S3.** Distribution diagram of **L3** as a function of the pH.  $[L3] = 1.0 \cdot 10^{-3}$  M.

**Figure S4.** Distribution diagram of **L4** as a function of the pH.  $[L4] = 1.0 \cdot 10^{-3}$  M.

**Figure S5.** Distribution diagram of **L5** as a function of the pH.  $[L5] = 1.0 \cdot 10^{-3}$  M.

**Figure S6.** Distribution diagram of the system GMP-**L1** as a function of the pH.  $[GMP] = [L1] = 1.0 \cdot 10^{-3}$  M.

**Figure S7.** Distribution diagram of the system GMP-**L2** as a function of the pH.  $[GMP] = [L2] = 1.0 \cdot 10^{-3}$  M.

**Figure S8.** Distribution diagram of the system GMP-**L3** as a function of the pH.  $[GMP] = [L3] = 1.0 \cdot 10^{-3}$  M.

**Figure S9.** Distribution diagram of the system GMP-**L4** as a function of the pH.  $[GMP] = [L4] = 1.0 \cdot 10^{-3}$  M.

**Figure S10.** Distribution diagram of the system GMP-**L5** as a function of the pH.  $[GMP] = [L5] = 1.0 \cdot 10^{-3}$  M.

**Figure S11.** Plot of the values of the logarithms of the effective constants for the interaction of **L1-L5** with GMP.  $[L1-L5] = [GMP] = 1.0 \cdot 10^{-3}$  M.

**Figure S12.** Oscillatory stress sweep experiments for the GMP-**L1** system.  $G'$ : Filled circles.  $G''$ : Empty circles. GMP:**L1** molar ratios: 3:1 (purple), 4:1 (green), 5:1 (blue), 10:1 (red) and 30:1 (orange).

**Figure S13.** Oscillatory stress sweep experiments for the GMP-**L2** system.  $G'$ : Filled circles.  $G''$ : Empty circles. GMP:**L2** molar ratios: 3:1 (purple), 4:1 (green), 5:1 (blue) and 10:1 (red).

**Figure S14.** Oscillatory stress sweep experiments for the GMP-**L3** system.  $G'$ : Filled circles.  $G''$ : Empty circles. GMP:**L3** molar ratios: 3:1 (purple), 4:1 (green), 5:1 (blue), 10:1 (red), 30:1 (orange) and 50:1 (grey).

**Figure S15.** Oscillatory stress sweep experiments for the GMP-**L5** system.  $G'$ : Filled circles.  $G''$ : Empty circles. GMP:**L5** molar ratios: 4:1 (green), 5:1 (blue), 10:1 (red), 30:1 (orange) and 50:1 (grey).

**Figure S16.** Evolution of the  $^1H$  NMR signals for the system GMP-**L1** employing the optimal conditions for hydrogel formation deduced from rheology: GMP:**L1** 3:1 molar ratio.  $H1'$  signal from the GMP molecule (purple).  $H4$  signal from the polyamine (green).

**Figure S17.** Evolution of the  $^1\text{H}$  NMR signals for the system GMP-**L2** employing the optimal conditions for hydrogel formation deduced from rheology: GMP:**L2** 3:1 molar ratio. H1' signal from the GMP molecule (purple). H4 signal from the polyamine (green).

**Figure S18.** Evolution of the  $^1\text{H}$  NMR for the system GMP-**L3** employing the optimal conditions for hydrogel formation deduced from rheology: GMP:**L3** 4:1 molar ratio. H1' signal from the GMP molecule (purple). H4 signal from the polyamine (green).

**Figure S19.** Evolution of the  $^1\text{H}$  NMR for the system GMP-**L5** employing the optimal conditions for hydrogel formation deduced from rheology: GMP:**L5** 5:1 molar ratio. H1' signal from the GMP molecule (purple). H4 signal from the polyamine (green).

**Figure S20.** Oscillatory stress sweep experiments for the GMP-**L1**-Isoniazid system. G': Filled circles. G'': Empty circles. GMP:**L1** in 3:1 molar ratio in the absence of isoniazid (blue), having 1 mg of isoniazid per mL of hydrogel (green) and having 10 mg of isoniazid per mL of hydrogel (orange).

**Figure S21.** Oscillatory stress sweep experiments for the GMP-**L2**-Isoniazid system. G': Filled circles. G'': Empty circles. GMP:**L2** in 3:1 molar ratio in the absence of isoniazid (blue) and having 1 mg of isoniazid per mL of hydrogel (green).

**Figure S22.** Oscillatory stress sweep experiments for the GMP-**L3**-Isoniazid system. G': Filled circles. G'': Empty circles. GMP:**L3** in 4:1 molar ratio in the absence of isoniazid (blue), having 1 mg of isoniazid per mL of hydrogel (green) and having 10 mg of isoniazid per mL of hydrogel (orange).

**Figure S23.** Oscillatory stress sweep experiments for the GMP-**L5**-Isoniazid system. G': Filled circles. G'': Empty circles. GMP:**L5** in 5:1 molar ratio in the absence of isoniazid (blue) and having 1 mg of isoniazid per mL of hydrogel (green).

**Figure S24.** (a)  $^1\text{H}$  NMR spectrum of **L1** in  $\text{D}_2\text{O}$ . (b)  $^{13}\text{C}$  NMR spectrum of **L1** in  $\text{D}_2\text{O}$ .

**Figure S25.** (a)  $^1\text{H}$  NMR spectrum of **L2** in  $\text{D}_2\text{O}$ . (b)  $^{13}\text{C}$  NMR spectrum of **L2** in  $\text{D}_2\text{O}$ .

**Figure S26.** (a)  $^1\text{H}$  NMR spectrum of **L3** in  $\text{D}_2\text{O}$ . (b)  $^{13}\text{C}$  NMR spectrum of **L3** in  $\text{D}_2\text{O}$ .

**Figure S27.** (a)  $^1\text{H}$  NMR spectrum of **L4** in  $\text{D}_2\text{O}$ . (b)  $^{13}\text{C}$  NMR spectrum of **L4** in  $\text{D}_2\text{O}$ .

**Figure S28.** (a)  $^1\text{H}$  NMR spectrum of **L5** in  $\text{D}_2\text{O}$ . (b)  $^{13}\text{C}$  NMR spectrum of **L5** in  $\text{D}_2\text{O}$ .

**Figure S29.** Mass spectrum of **L1** in  $\text{H}_2\text{O}$ .

**Figure S30.** Mass spectrum of **L2** in  $\text{H}_2\text{O}$ .

**Figure S31.** Mass spectrum of **L3** in  $\text{H}_2\text{O}$ .

**Figure S32.** Mass spectrum of **L4** in  $\text{H}_2\text{O}$ .

**Figure S33.** Mass spectrum of **L5** in H<sub>2</sub>O.

**Table S1.** Logarithms of the stability constants for the interaction of GMP with the receptors **L1-L5**, determined in 0.15 M NaCl at 298.0 ± 0.1 K.

**Table S2.** Rheological properties of the hybrid hydrogels at different GMP:polyamine molar ratios for the system GMP-**L1**.

**Table S3.** Rheological properties of the hybrid hydrogels at different GMP:polyamine molar ratios for the system GMP-**L2**.

**Table S4.** Rheological properties of the hybrid hydrogels at different GMP:polyamine molar ratios for the system GMP-**L3**.

**Table S5.** Rheological properties of the hybrid hydrogels at different GMP:polyamine molar ratios for the system GMP-**L5**.

**Table S6.** Rheological properties of the hybrid hydrogels for the system GMP-**L1**-Isoniazid at GMP:**L1** 3:1 molar ratio in the absence and in the presence of different amounts of isoniazid.

**Table S7.** Rheological properties of the hybrid hydrogels for the system GMP-**L2**-Isoniazid at GMP:**L2** 3:1 molar ratio in the absence and in the presence of different amounts of isoniazid.

**Table S8.** Rheological properties of the hybrid hydrogels for the system GMP-**L3**-Isoniazid at GMP:**L3** 4:1 molar ratio in the absence and in the presence of different amounts of isoniazid.

**Table S9.** Rheological properties of the hybrid hydrogels for the system GMP-**L5**-Isoniazid at GMP:**L5** 5:1 molar ratio in the absence and in the presence of different amounts of isoniazid.

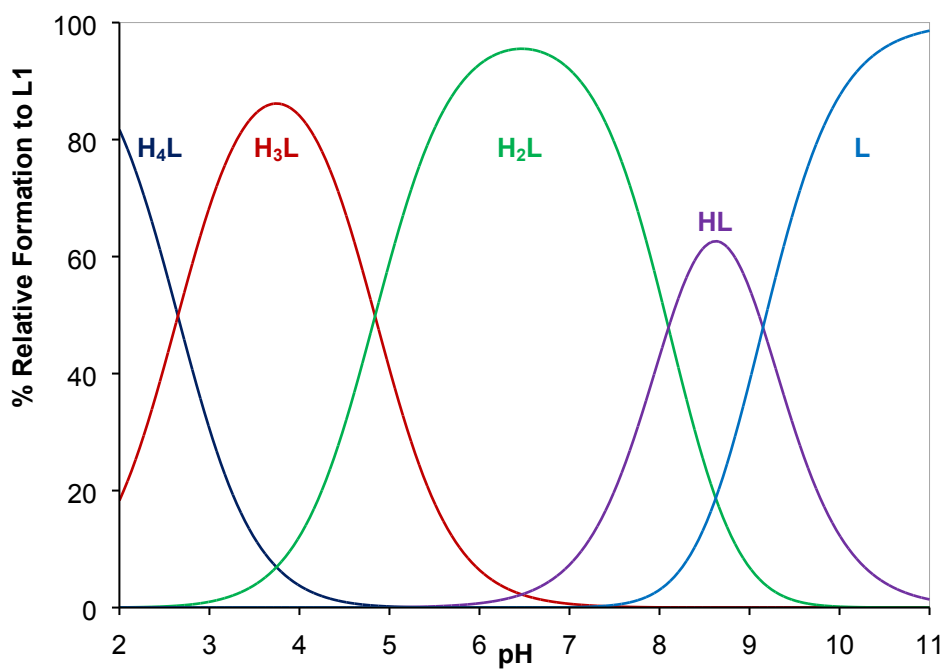

**Figure S1.** Distribution diagram of **L1** as a function of pH.  $[L1] = 1.0 \cdot 10^{-3}$  M.

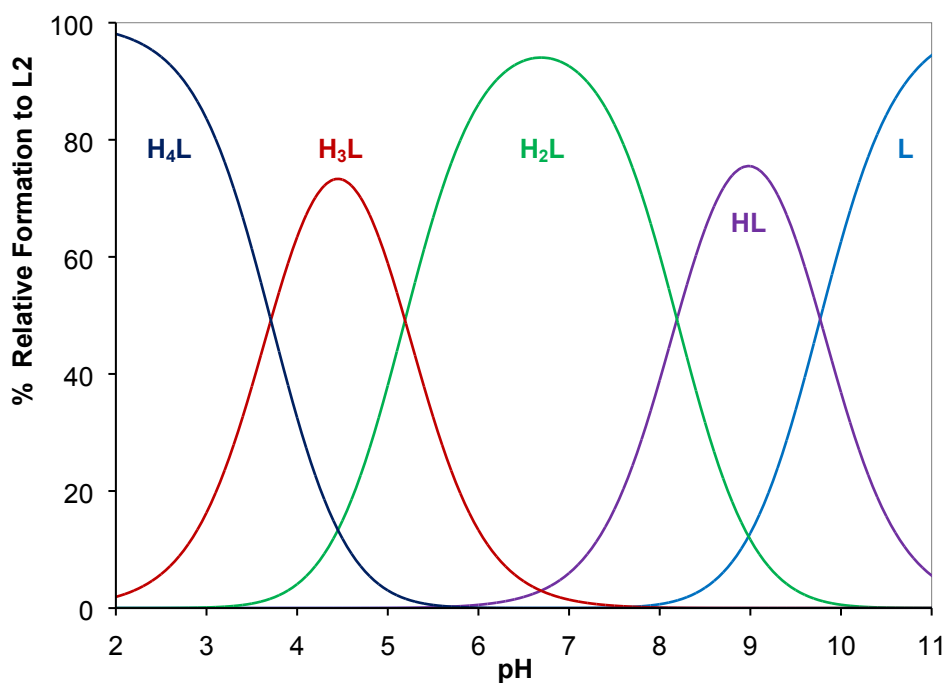

**Figure S2.** Distribution diagram of **L2** as a function of pH.  $[L2] = 1.0 \cdot 10^{-3}$  M.

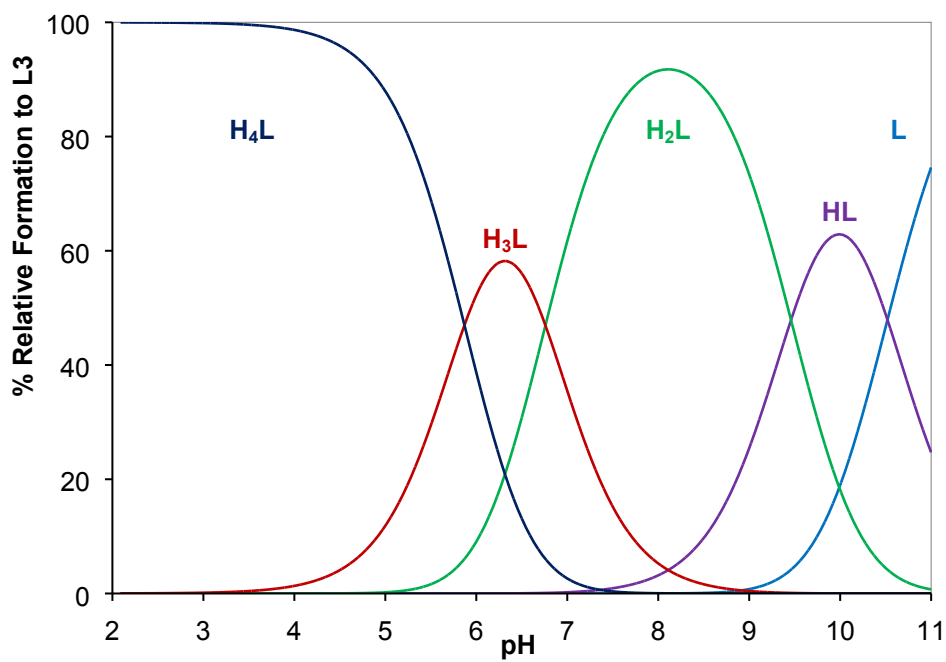

**Figure S3.** Distribution diagram of **L3** as a function of pH.  $[L3] = 1.0 \cdot 10^{-3}$  M.

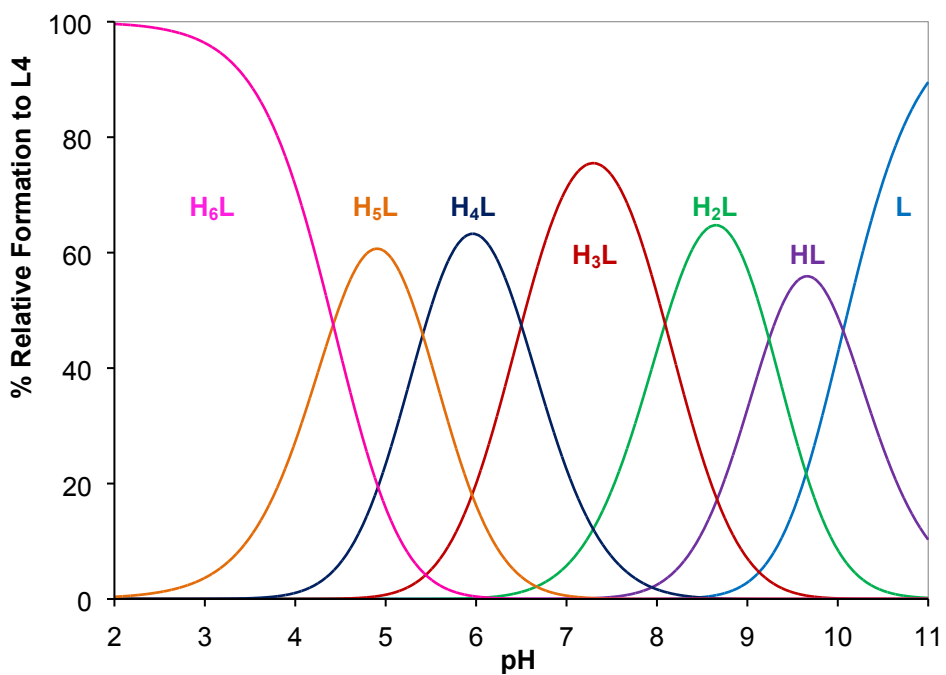

**Figure S4.** Distribution diagram of **L4** as a function of pH.  $[L4] = 1.0 \cdot 10^{-3}$  M.

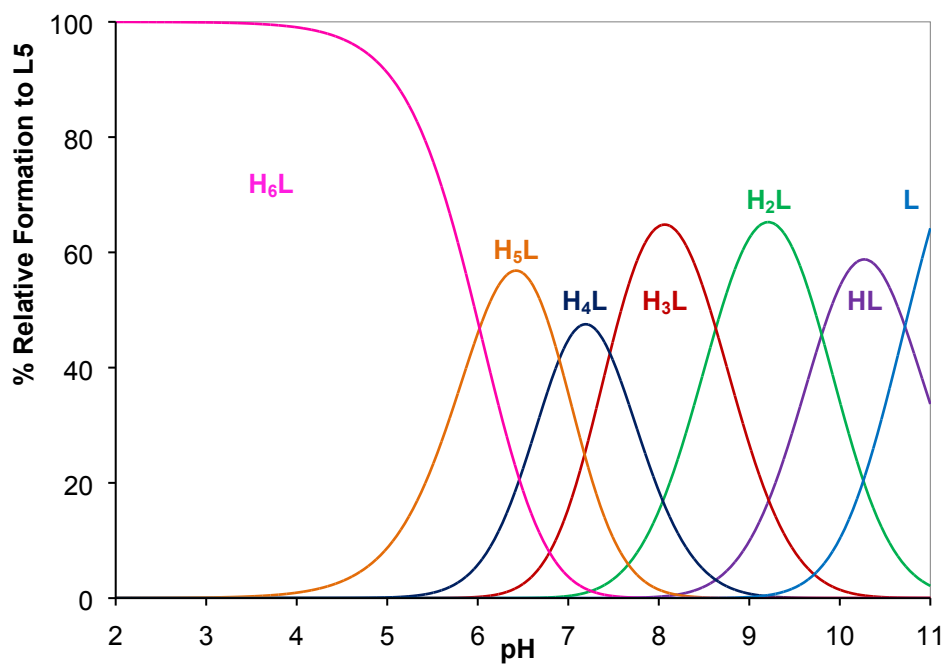

**Figure S5.** Distribution diagram of **L5** as a function of pH.  $[L5] = 1.0 \cdot 10^{-3}$  M.

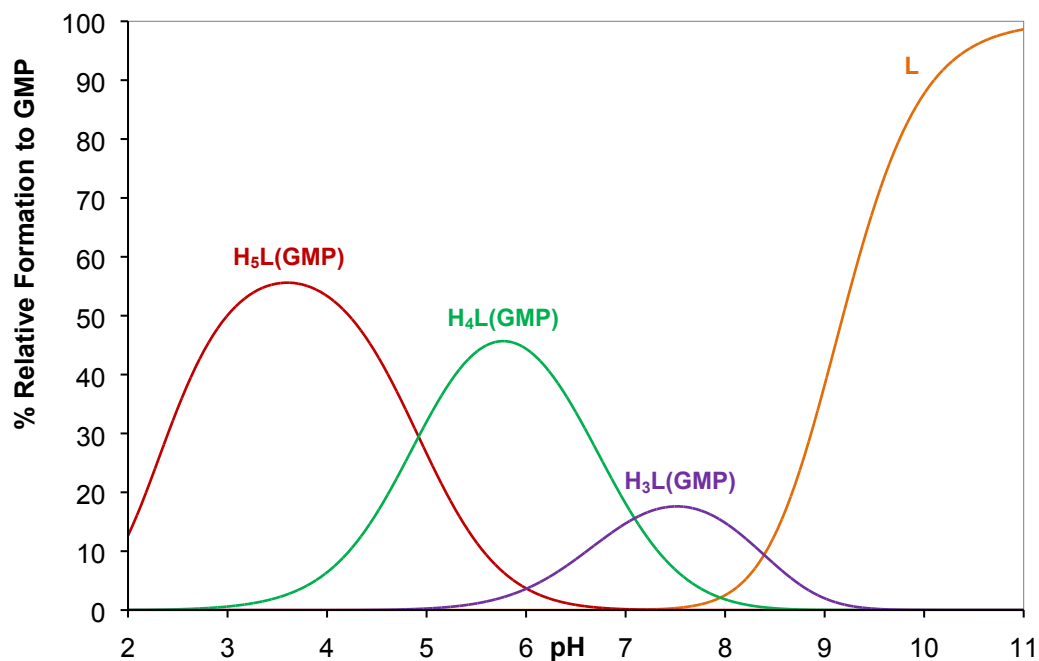

**Figure S6.** Distribution diagram of the system GMP-L1 as a function of pH.  $[GMP] = [L1] = 1.0 \cdot 10^{-3}$  M.

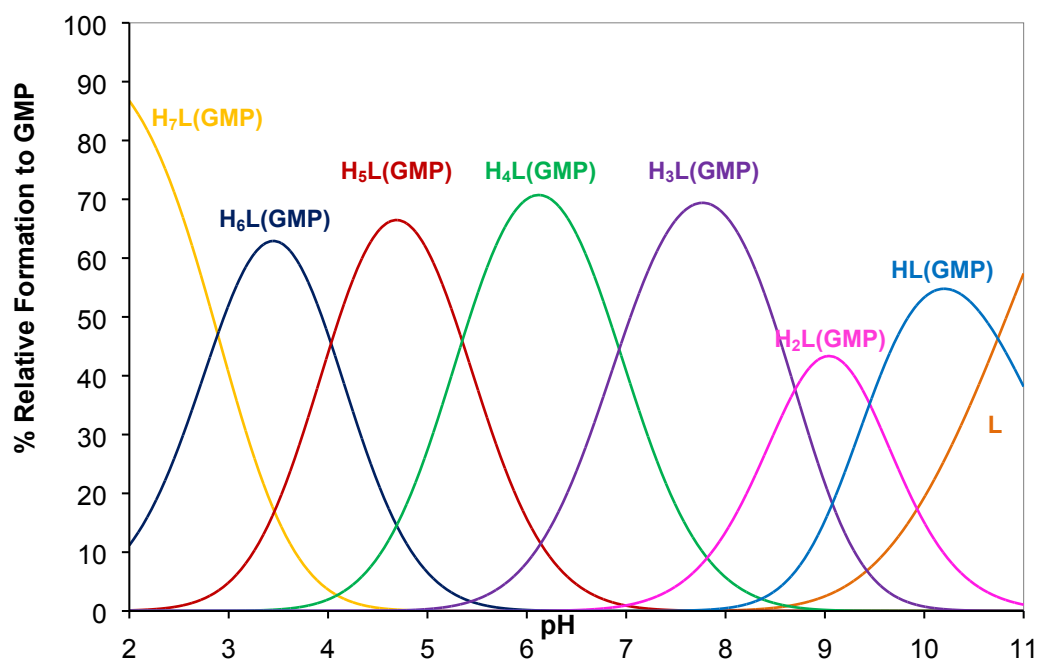

**Figure S7.** Distribution diagram of the system GMP-L2 as a function of pH.  $[GMP] = [L2] = 1.0 \cdot 10^{-3}$  M.



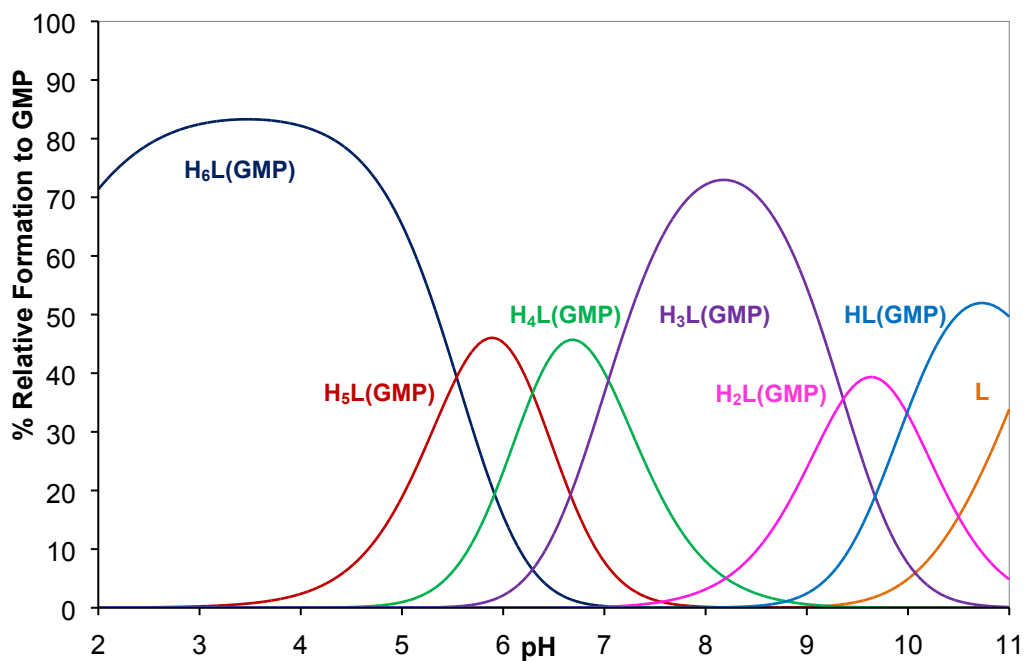

**Figure S8.** Distribution diagram of the system GMP-L3 as a function of pH.  $[GMP] = [L3] = 1.0 \cdot 10^{-3}$  M.

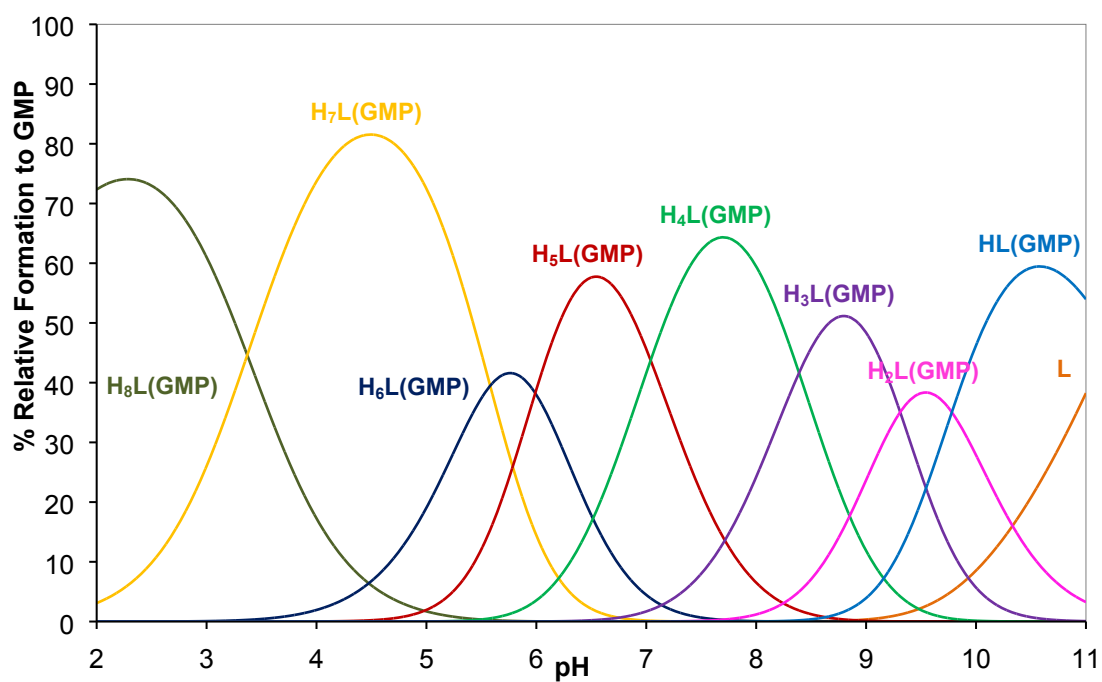

**Figure S9.** Distribution diagram of the system GMP-L4 as a function of pH.  $[GMP] = [L4] = 1.0 \cdot 10^{-3}$  M.

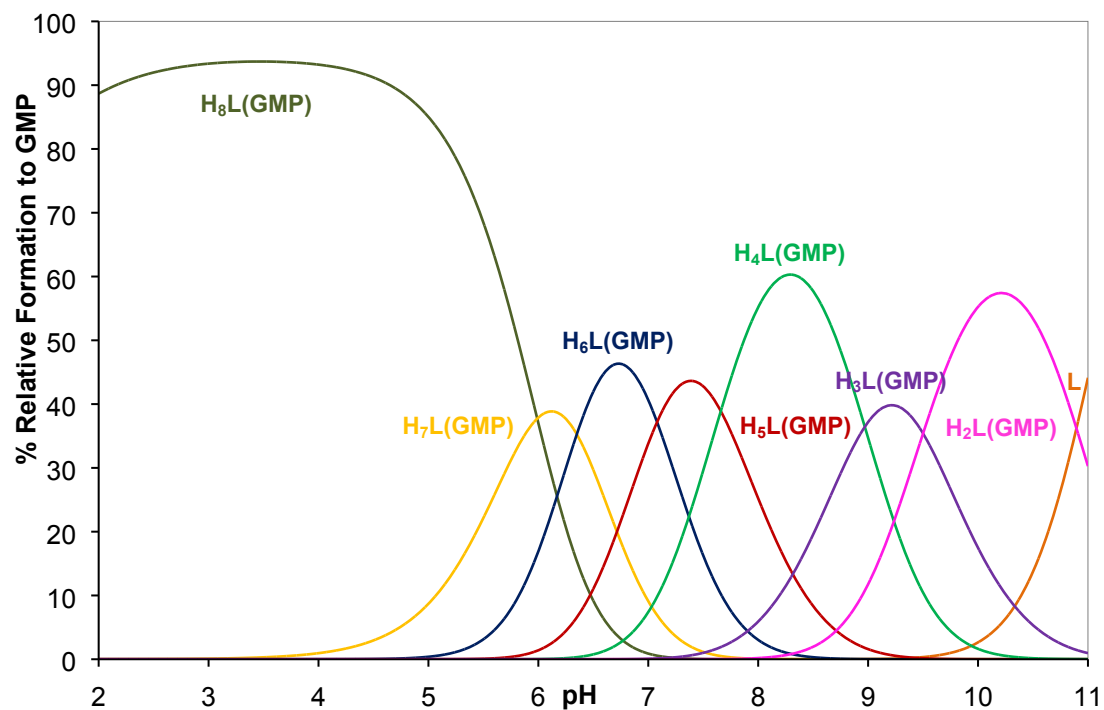

**Figure S10.** Distribution diagram of the system GMP-L5 as a function of pH.  $[GMP] = [L5] = 1.0 \cdot 10^{-3} \text{ M}$ .

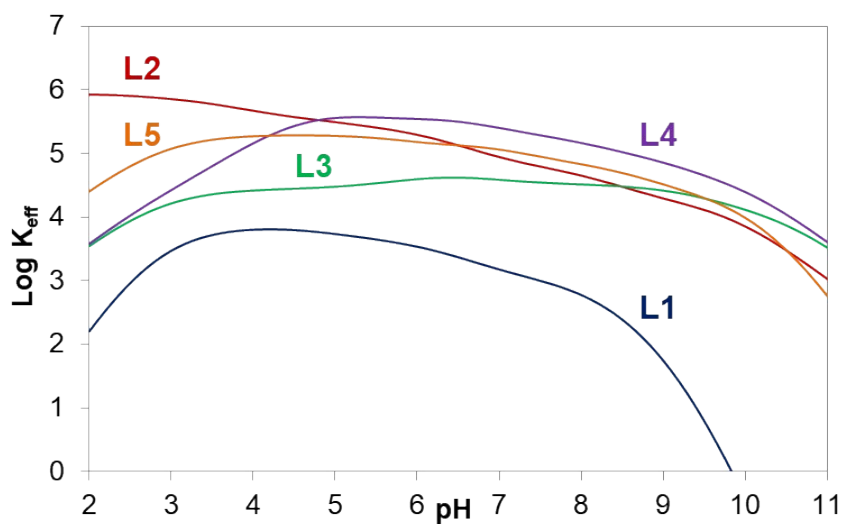

**Figure S11.** Plot of the values of the logarithms of the effective constants for the interaction of L1-L5 with GMP.  $[L1-L5] = [GMP] = 1.0 \cdot 10^{-3} \text{ M}$ .

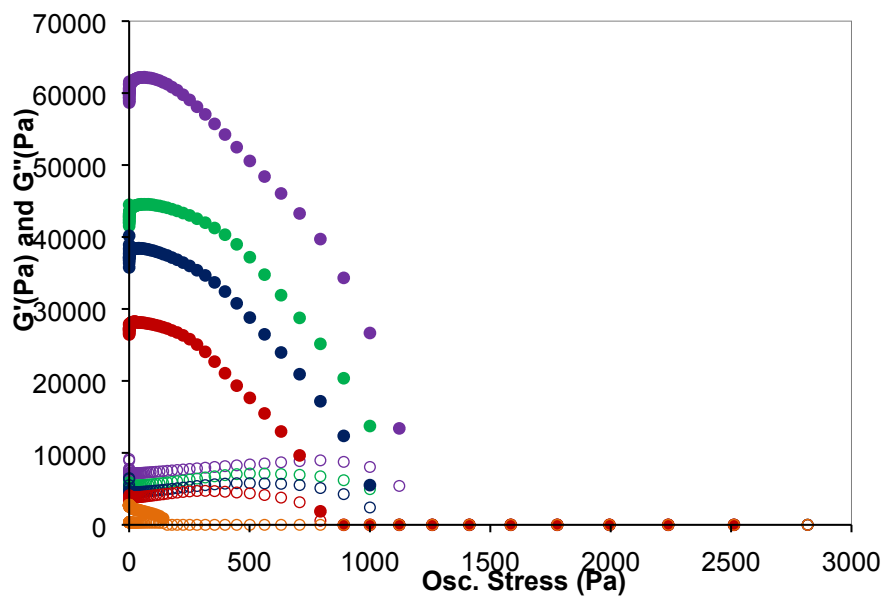

**Figure S12.** Oscillatory stress sweep experiments for the GMP-L1 system.  $G'$ : Filled circles.  $G''$ : Empty circles. GMP:L1 molar ratios: 3:1 (purple), 4:1 (green), 5:1 (blue), 10:1 (red) and 30:1 (orange).

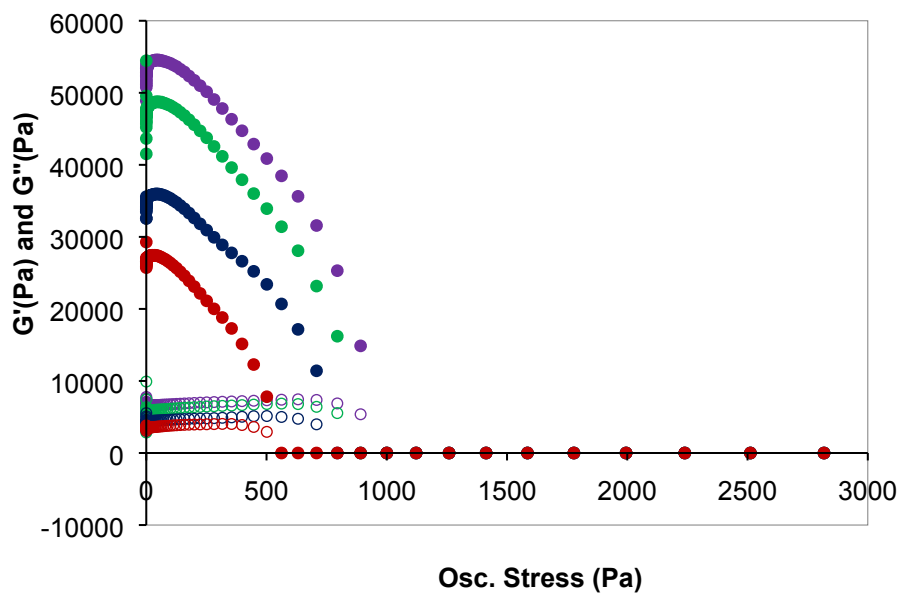

**Figure S13.** Oscillatory stress sweep experiments for the GMP-L2 system.  $G'$ : Filled circles.  $G''$ : Empty circles. GMP:L2 molar ratios: 3:1 (purple), 4:1 (green), 5:1 (blue) and 10:1 (red).

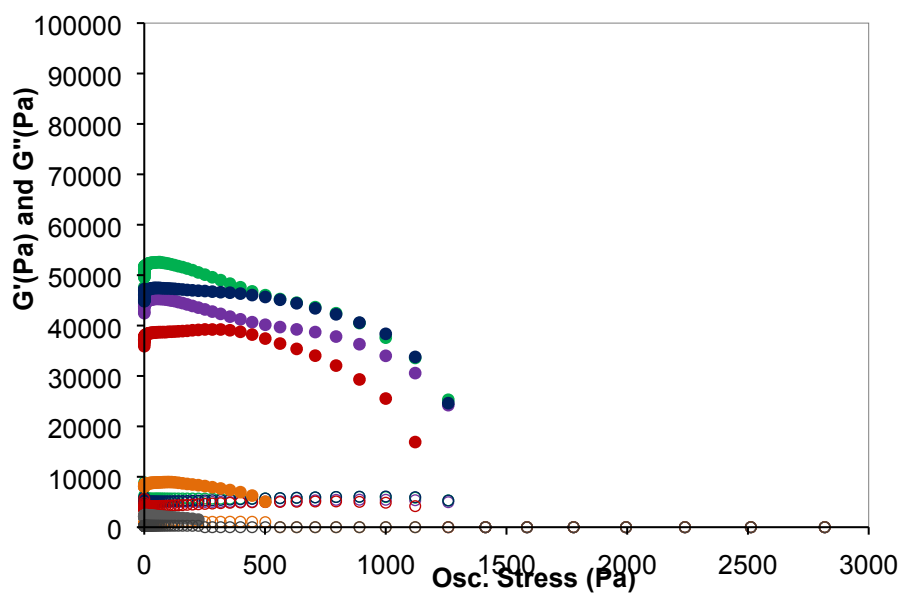

**Figure S14.** Oscillatory stress sweep experiments for the GMP-L3 system. G': Filled circles. G'': Empty circles. GMP:L3 molar ratios: 3:1 (purple), 4:1 (green), 5:1 (blue), 10:1 (red), 30:1 (orange) and 50:1 (grey).

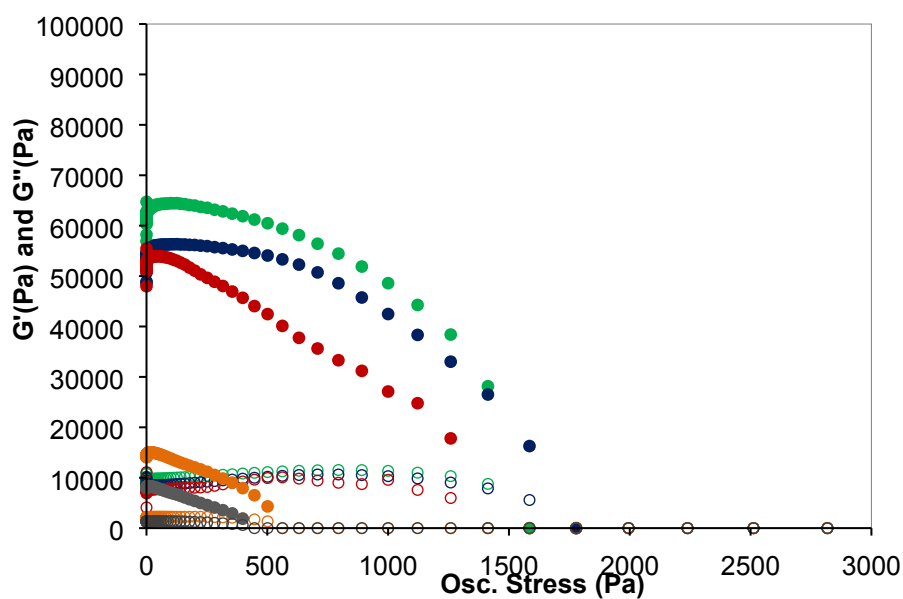

**Figure S15.** Oscillatory stress sweep experiments for the GMP-L5 system. G': Filled circles. G'': Empty circles. GMP:L5 molar ratios: 4:1 (green), 5:1 (blue), 10:1 (red), 30:1 (orange) and 50:1 (grey).

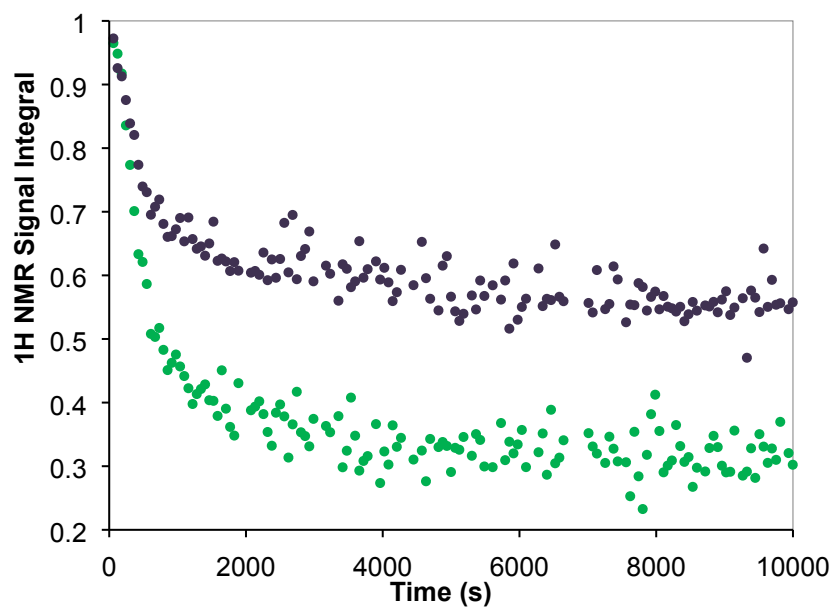

**Figure S16.** Evolution of the  $^1\text{H}$  NMR signals for the system GMP-L1 employing the optimal conditions for hydrogel formation deduced from rheology: GMP:L1 3:1 molar ratio. H1' signal from the GMP molecule (purple). H4 signal from the polyamine (green).

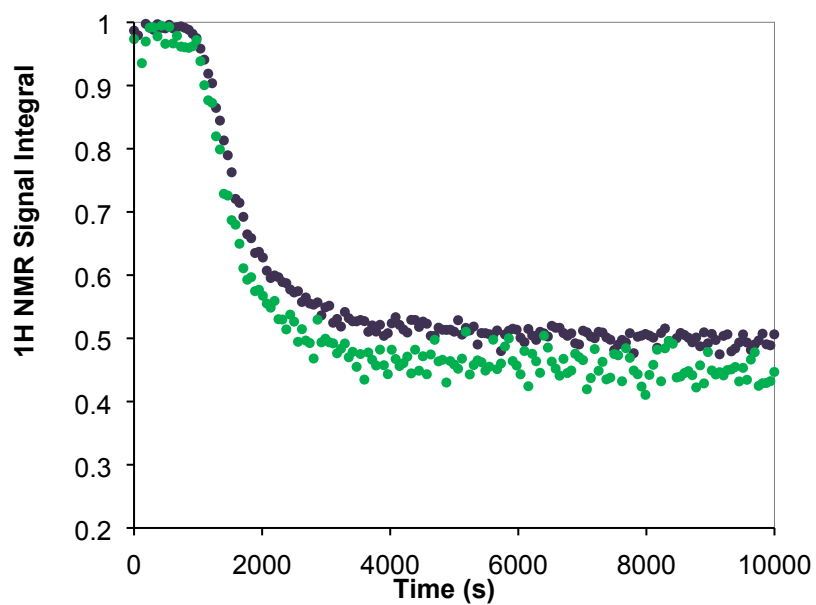

**Figure S17.** Evolution of the  $^1\text{H}$  NMR signals for the system GMP-L2 employing the optimal conditions for hydrogel formation deduced from rheology: GMP:L2 3:1 molar ratio. H1' signal from the GMP molecule (purple). H4 signal from the polyamine (green).

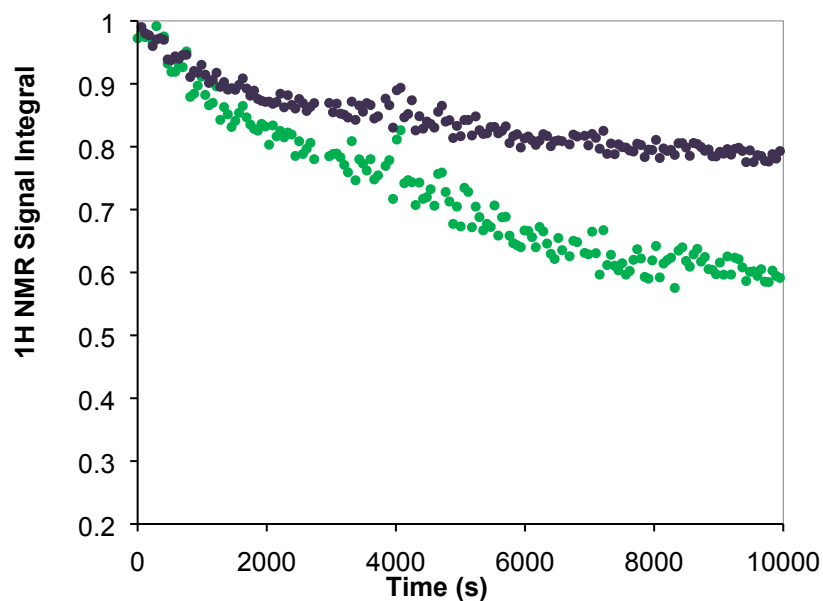

**Figure S18.** Evolution of the  $^1\text{H}$  NMR signals for the system GMP-L3 employing the optimal conditions for hydrogel formation deduced from rheology: GMP:L3 4:1 molar ratio. H1' signal from the GMP molecule (purple). H4 signal from the polyamine (green).

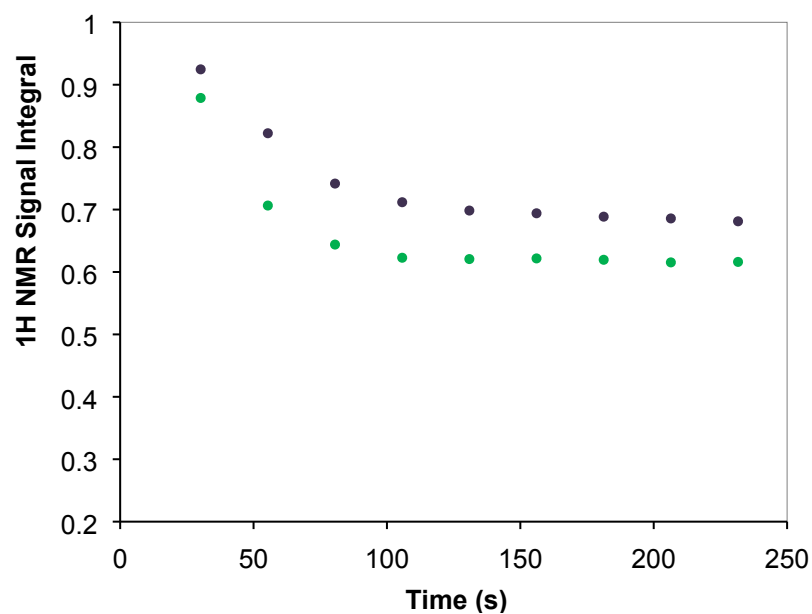

**Figure S19.** Evolution of the  $^1\text{H}$  NMR signals for the system GMP-L5 employing the optimal conditions for hydrogel formation deduced from rheology: GMP:L5 5:1 molar ratio. H1' signal from the GMP molecule (purple). H4 signal from the polyamine (green).

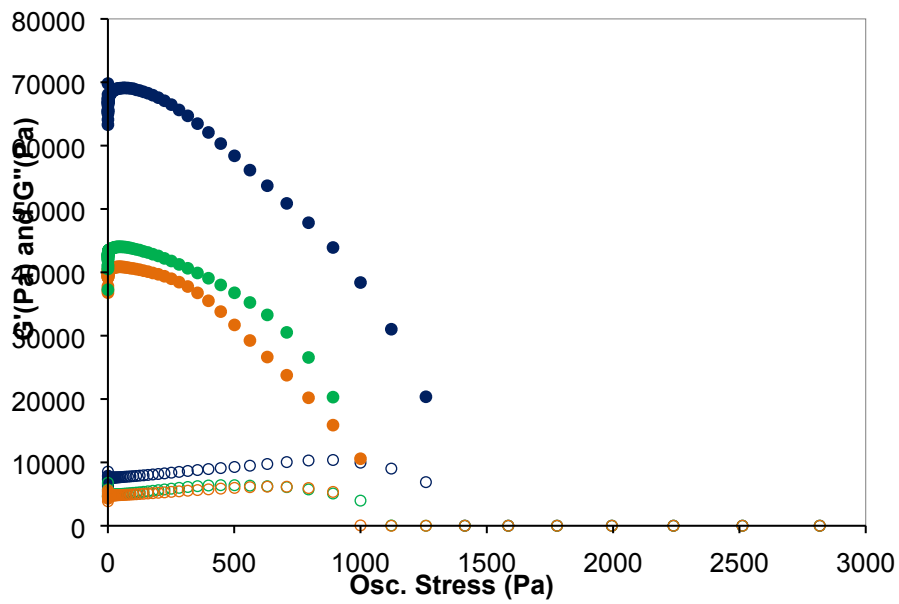

**Figure S20.** Oscillatory stress sweep experiments for the GMP-L1-Isoniazid system.  $G'$ : Filled circles.  $G''$ : Empty circles. GMP:L1 in 3:1 molar ratio in the absence of isoniazid (blue), having 1 mg of isoniazid per mL of hydrogel (green) and having 10 mg of isoniazid per mL of hydrogel (orange).

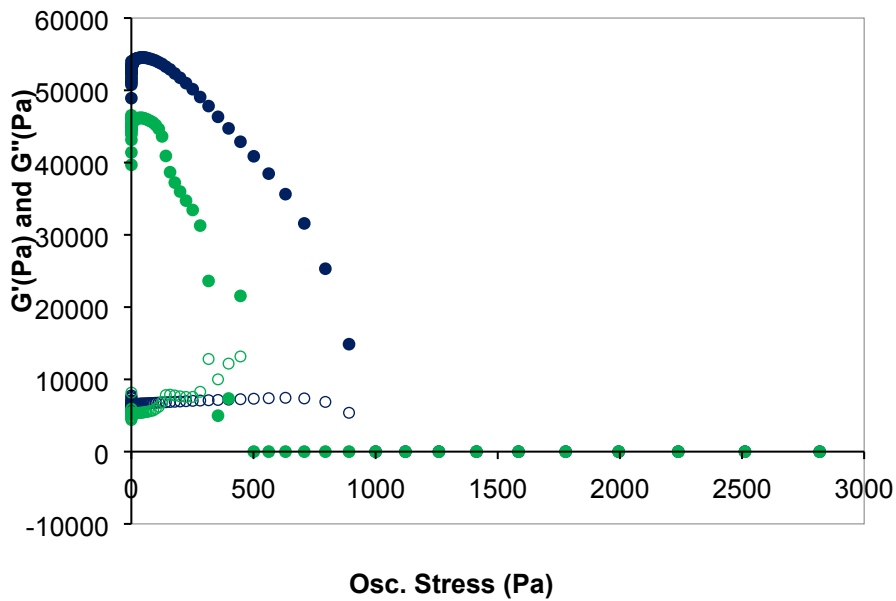

**Figure S21.** Oscillatory stress sweep experiments for the GMP-L2-Isoniazid system.  $G'$ : Filled circles.  $G''$ : Empty circles. GMP:L2 in 3:1 molar ratio in the absence of isoniazid (blue) and having 1 mg of isoniazid per mL of hydrogel (green).

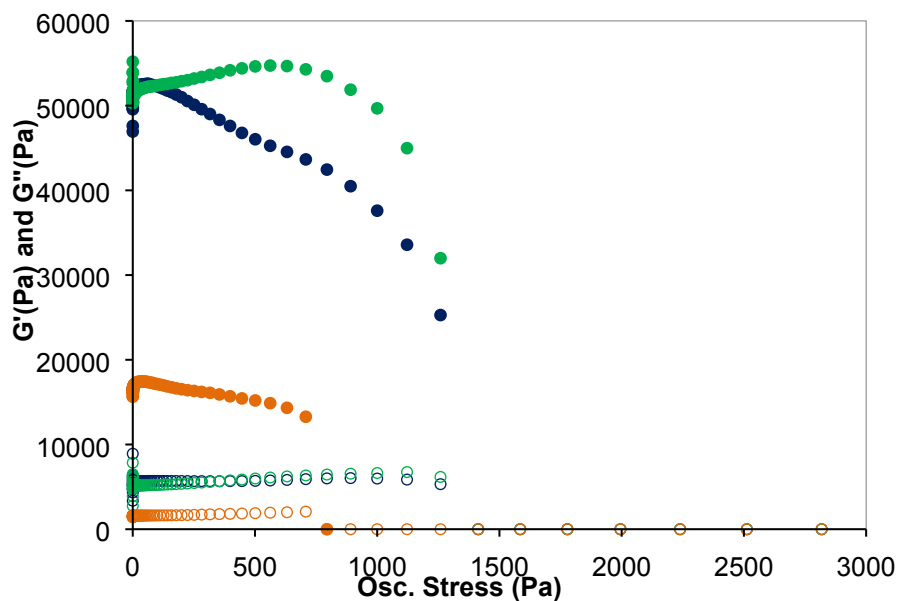

**Figure S22.** Oscillatory stress sweep experiments for the GMP-L3-Isoniazid system.  $G'$ : Filled circles.  $G''$ : Empty circles. GMP:L3 in 4:1 molar ratio in the absence of isoniazid (blue), having 1 mg of isoniazid per mL of hydrogel (green) and having 10 mg of isoniazid per mL of hydrogel (orange).

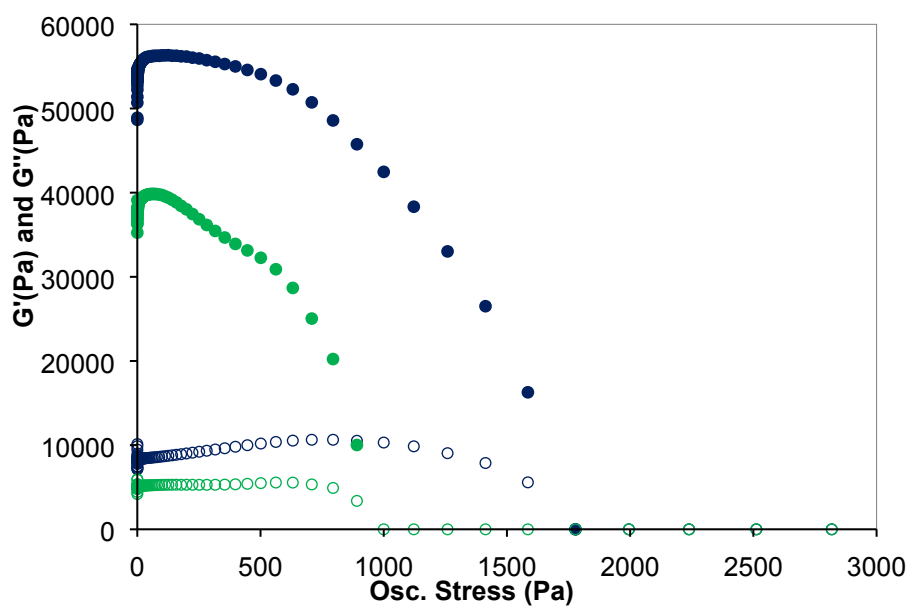

**Figure S23.** Oscillatory stress sweep experiments for the GMP-L5-Isoniazid system.  $G'$ : Filled circles.  $G''$ : Empty circles. GMP:L5 in 5:1 molar ratio in the absence of isoniazid (blue) and having 1 mg of isoniazid per mL of hydrogel (green).



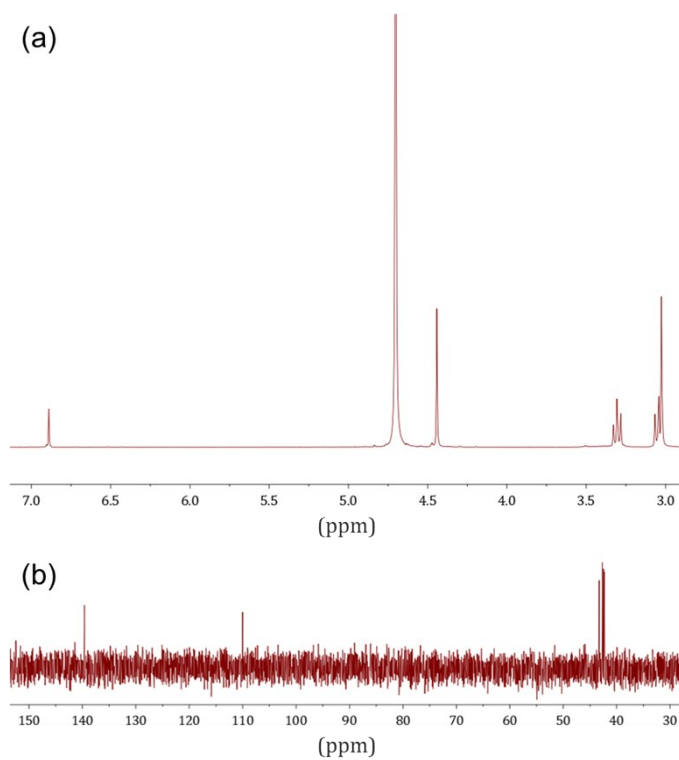

**Figure S24.** (a)  $^1\text{H}$  NMR spectrum of **L1** in  $\text{D}_2\text{O}$ . (b)  $^{13}\text{C}$  NMR spectrum of **L1** in  $\text{D}_2\text{O}$ .

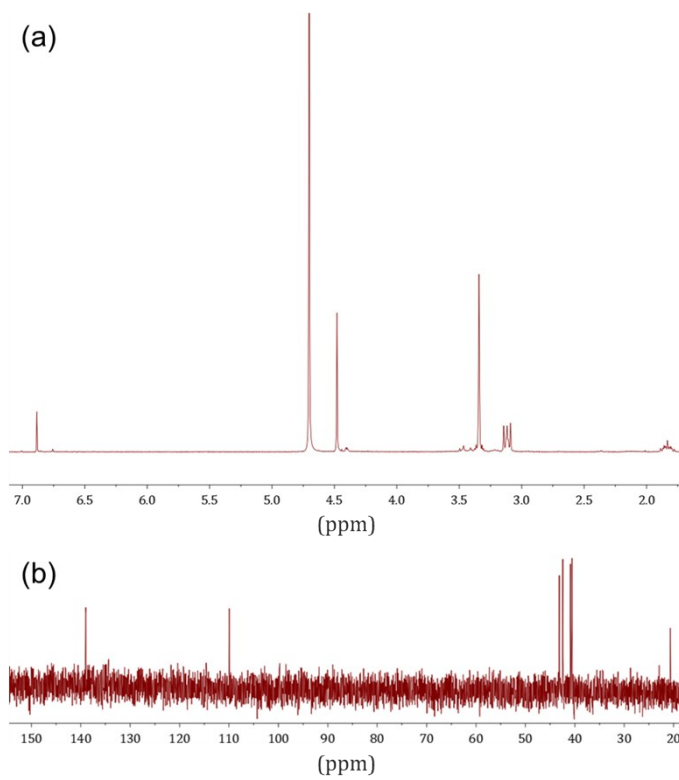

**Figure S25.** (a)  $^1\text{H}$  NMR spectrum of **L2** in  $\text{D}_2\text{O}$ . (b)  $^{13}\text{C}$  NMR spectrum of **L2** in  $\text{D}_2\text{O}$ .

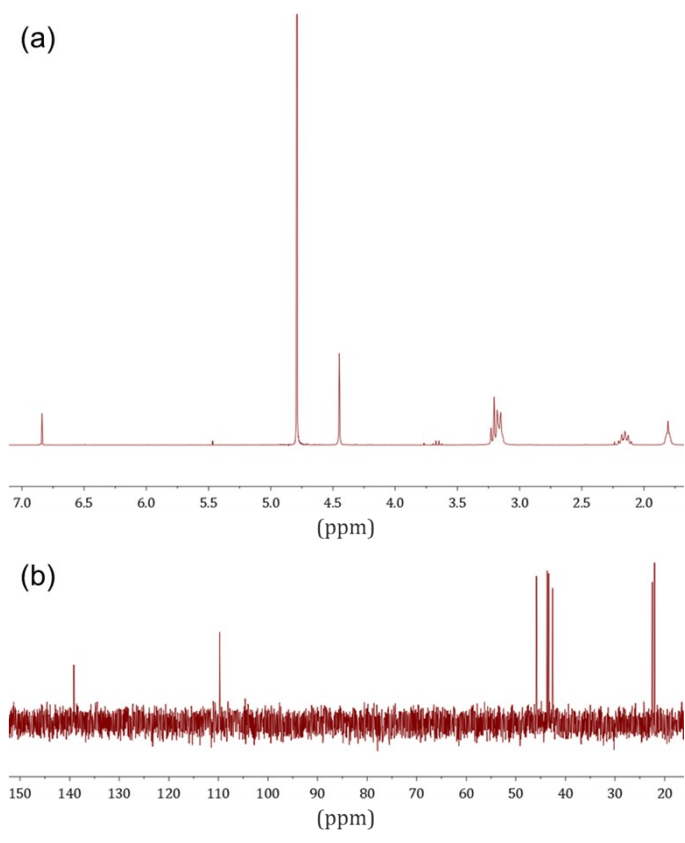

**Figure S26.** (a)  $^1\text{H}$  NMR spectrum of **L3** in  $\text{D}_2\text{O}$ . (b)  $^{13}\text{C}$  NMR spectrum of **L3** in  $\text{D}_2\text{O}$ .

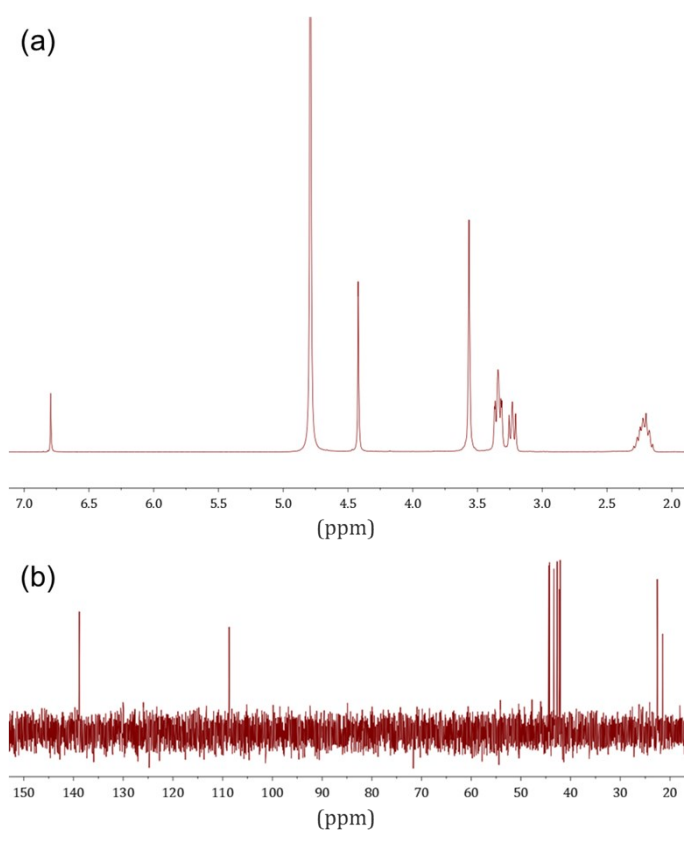

**Figure S27.** (a)  $^1\text{H}$  NMR spectrum of **L4** in  $\text{D}_2\text{O}$ . (b)  $^{13}\text{C}$  NMR spectrum of **L4** in  $\text{D}_2\text{O}$ .

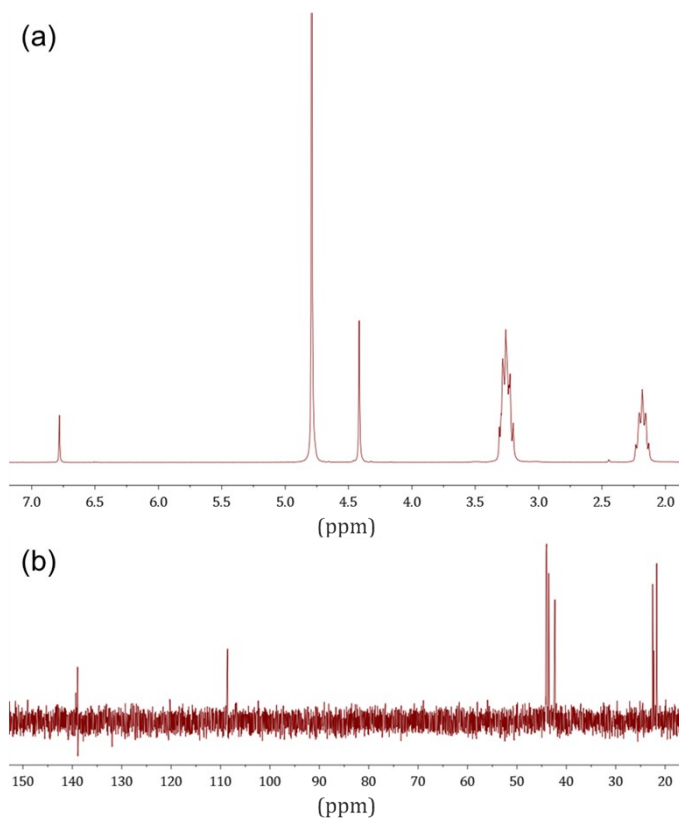

**Figure S28.** (a)  $^1\text{H}$  NMR spectrum of **L5** in  $\text{D}_2\text{O}$ . (b)  $^{13}\text{C}$  NMR spectrum of **L5** in  $\text{D}_2\text{O}$ .

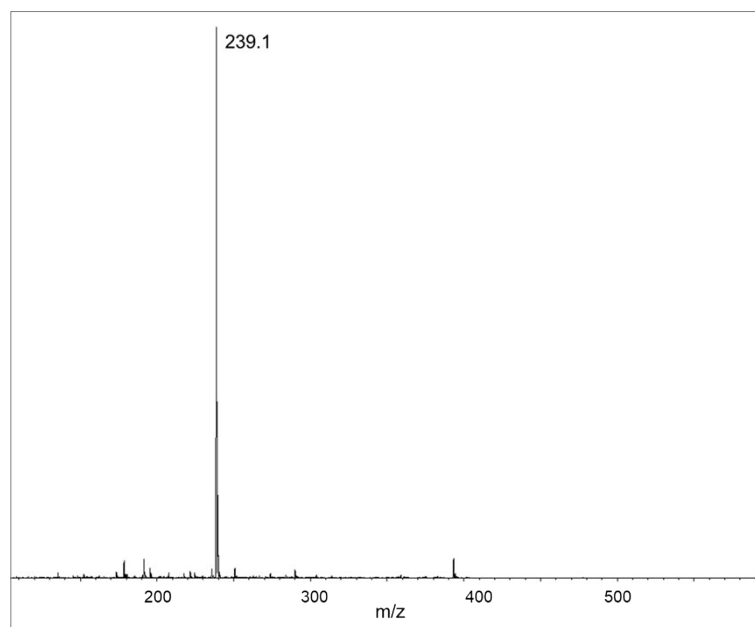

**Figure S29.** Mass spectrum of **L1** in  $\text{H}_2\text{O}$ .

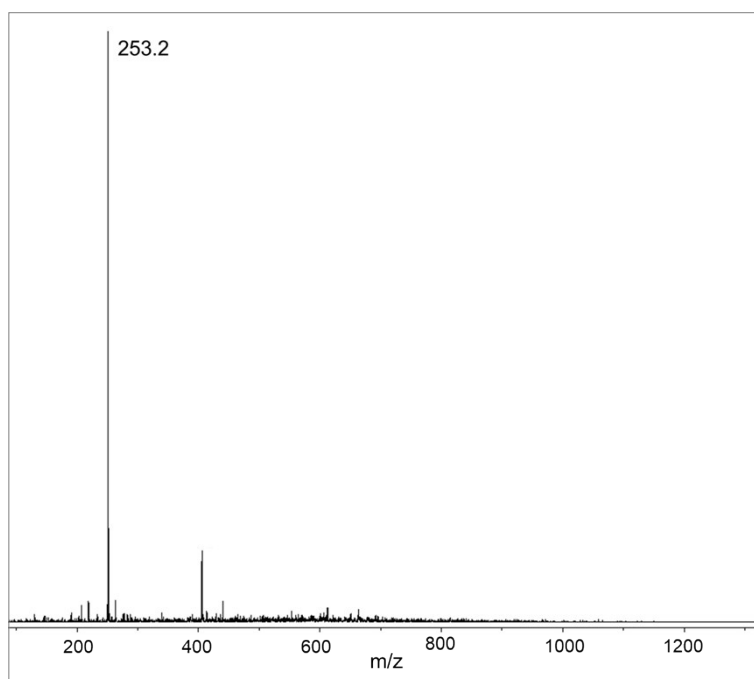

**Figure S30.** Mass spectrum of **L2** in H<sub>2</sub>O.

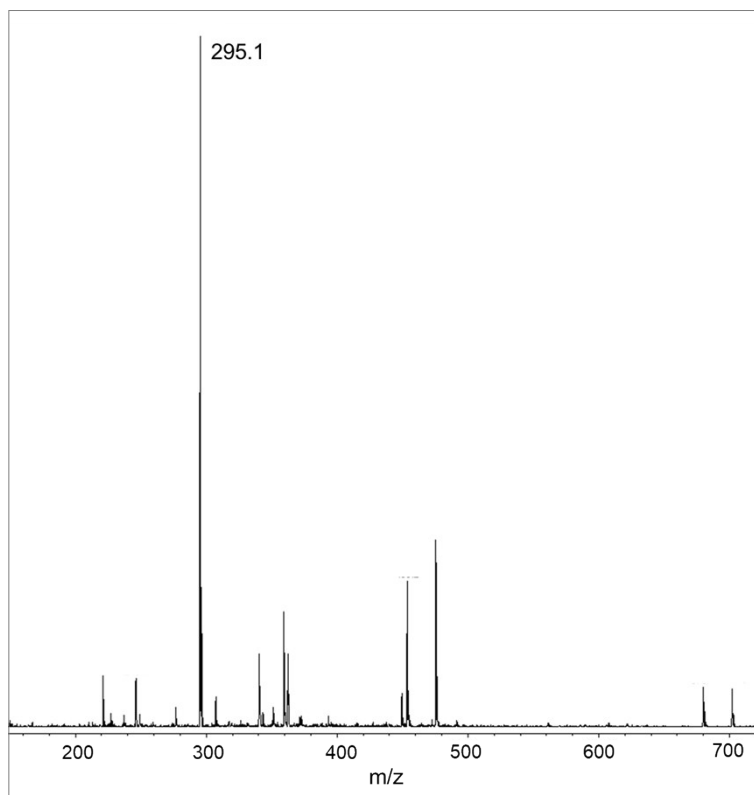

**Figure S31.** Mass spectrum of **L3** in H<sub>2</sub>O.

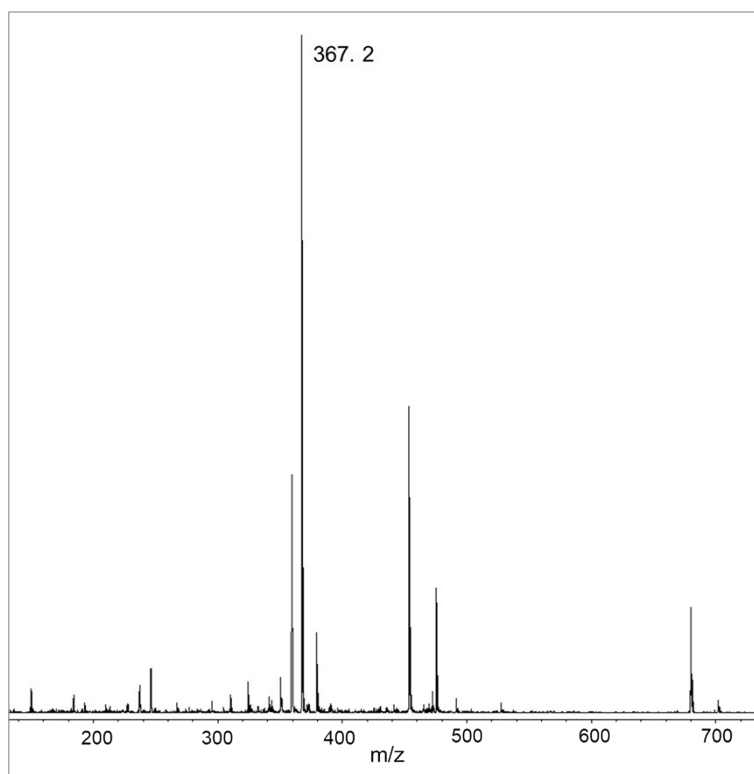

**Figure S32.** Mass spectrum of **L4** in H<sub>2</sub>O.

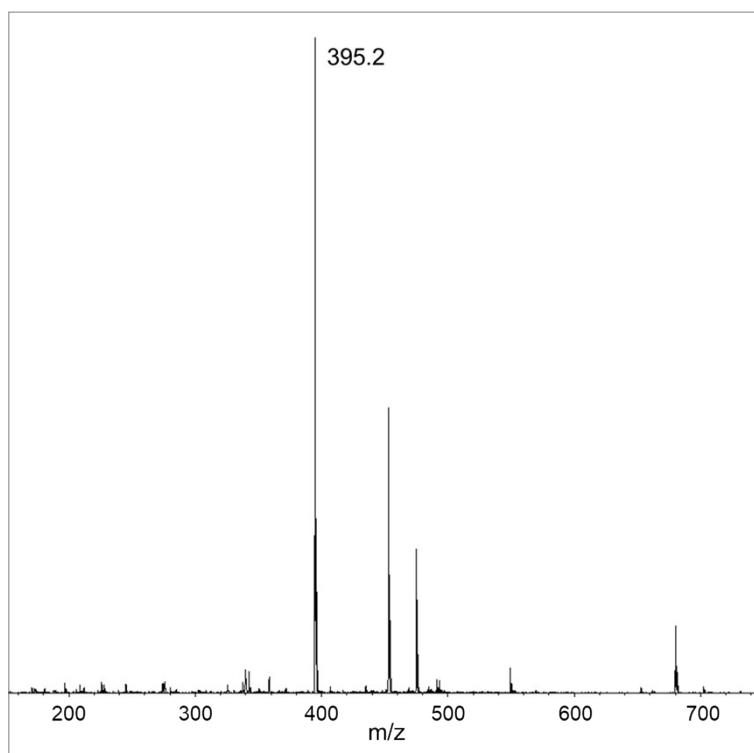

**Figure S33.** Mass spectrum of **L5** in H<sub>2</sub>O.

**Table S1.** Logarithms of the stability constants for the interaction of GMP with the receptors **L1-L5**, determined in 0.15 M NaCl at 298.0 ± 0.1 K.

| Reaction                                                 | L1                   | L2      | L3      | L4      | L5      |
|----------------------------------------------------------|----------------------|---------|---------|---------|---------|
| <b>HL + H<sub>1</sub>G ⇌ LG<sup>a</sup></b>              | -                    | 4.28(5) | 4.10(6) | 4.58(5) | -       |
| <b>HL + G ⇌ HLG</b>                                      | -                    | 4.26(3) | 4.60(5) | 4.89(3) | 4.78(1) |
| <b>H<sub>2</sub>L + G ⇌ H<sub>2</sub>LG</b>              | -                    | 4.78(4) | 4.51(5) | 4.97(4) | 4.49(1) |
| <b>H<sub>2</sub>L + HG ⇌ H<sub>3</sub>LG</b>             | 3.02(7) <sup>b</sup> | 5.41(4) | -       | -       | -       |
| <b>H<sub>3</sub>L + G ⇌ H<sub>3</sub>LG</b>              | -                    | 5.61(4) | 4.79(5) | 5.28(4) | 4.83(1) |
| <b>H<sub>2</sub>L + H<sub>2</sub>G ⇌ H<sub>4</sub>LG</b> | 3.65(5)              | -       | -       | -       | -       |
| <b>H<sub>3</sub>L + HG ⇌ H<sub>4</sub>LG</b>             | -                    | 5.54(4) | 4.77(5) | -       | -       |
| <b>H<sub>4</sub>L + G ⇌ H<sub>4</sub>LG</b>              | -                    | -       | -       | 5.80(4) | 5.03(2) |
| <b>H<sub>3</sub>L + H<sub>2</sub>G ⇌ H<sub>5</sub>LG</b> | 3.87(3)              | -       | -       | -       | -       |
| <b>H<sub>4</sub>L + HG ⇌ H<sub>5</sub>LG</b>             | -                    | 5.89(4) | 4.44(5) | 5.54(4) | -       |
| <b>H<sub>5</sub>L + G ⇌ H<sub>5</sub>LG</b>              | -                    | -       | -       | -       | 5.26(2) |
| <b>H<sub>4</sub>L + H<sub>2</sub>G ⇌ H<sub>6</sub>LG</b> | -                    | 5.94(4) | -       | -       | -       |
| <b>H<sub>5</sub>L + HG ⇌ H<sub>6</sub>LG</b>             | -                    | -       | -       | 5.68(4) | 5.26(3) |
| <b>H<sub>6</sub>L + HG ⇌ H<sub>7</sub>LG</b>             | -                    | -       | -       | 4.45(6) | 5.30(2) |

(a) Charges omitted. (b) Values in parenthesis show standard deviation in the last significant figure.

**Table S2.** Rheological properties of the hybrid hydrogels at different GMP:polyamine molar ratios for the system GMP-L1.

| <b>GMP:L1<br/>Molar Ratio</b> | <b>Estimated<br/>Charge</b> | <b>G' (Pa)</b> | <b>G''(Pa)</b> | <b>γ (Pa)</b> |
|-------------------------------|-----------------------------|----------------|----------------|---------------|
| <b>3:1</b>                    | 0                           | 65000          | 7300           | 1190          |
| <b>4:1</b>                    | -1                          | 43000          | 5300           | 1000          |
| <b>5:1</b>                    | -2                          | 44000          | 5200           | 1000          |
| <b>6:1</b>                    | -3                          | 41000          | 4600           | 890           |
| <b>8:1</b>                    | -5                          | 32000          | 3900           | 790           |
| <b>10:1</b>                   | -7                          | 30000          | 4000           | 790           |
| <b>12:1</b>                   | -9                          | 22000          | 2800           | 560           |
| <b>30:1</b>                   | -27                         | 2400           | 300            | 140           |

**Table S3.** Rheological properties of the hybrid hydrogels at different GMP:polyamine molar ratios for the system GMP-L2.

| <b>GMP:L2<br/>Molar Ratio</b> | <b>Estimated<br/>Charge</b> | <b>G' (Pa)</b> | <b>G''(Pa)</b> | <b>γ (Pa)</b> |
|-------------------------------|-----------------------------|----------------|----------------|---------------|
| <b>3:1</b>                    | 0                           | 50000          | 6100           | 890           |
| <b>4:1</b>                    | -1                          | 48000          | 5900           | 790           |
| <b>5:1</b>                    | -2                          | 33000          | 4000           | 710           |
| <b>6:1</b>                    | -3                          | 30000          | 3800           | 670           |
| <b>8:1</b>                    | -5                          | 30000          | 3900           | 670           |
| <b>10:1</b>                   | -7                          | 26000          | 3400           | 500           |

**Table S4.** Rheological properties of the hybrid hydrogels at different GMP:polyamine molar ratios for the system GMP-L3.

| <b>GMP:L3<br/>Molar Ratio</b> | <b>Estimated<br/>Charge</b> | <b>G' (Pa)</b> | <b>G''(Pa)</b> | <b><math>\gamma</math> (Pa)</b> |
|-------------------------------|-----------------------------|----------------|----------------|---------------------------------|
| 3:1                           | +1                          | 45000          | 5000           | 1260                            |
| 4:1                           | 0                           | 49000          | 5400           | 1260                            |
| 5:1                           | -1                          | 47000          | 5100           | 1260                            |
| 6:1                           | -2                          | 43000          | 4800           | 1260                            |
| 8:1                           | -4                          | 43000          | 4800           | 1120                            |
| 10:1                          | -6                          | 40000          | 4300           | 1120                            |
| 12:1                          | -8                          | 30000          | 3100           | 1000                            |
| 30:1                          | -26                         | 8600           | 860            | 500                             |
| 50:1                          | -46                         | 2700           | 320            | 250                             |

**Table S5.** Rheological properties of the hybrid hydrogels at different GMP:polyamine molar ratios for the system GMP-L5.

| <b>GMP:L5<br/>Molar Ratio</b> | <b>Estimated<br/>Charge</b> | <b>G' (Pa)</b> | <b>G''(Pa)</b> | <b><math>\gamma</math> (Pa)</b> |
|-------------------------------|-----------------------------|----------------|----------------|---------------------------------|
| 4:1                           | +1                          | 65000          | 10000          | 1590                            |
| 5:1                           | 0                           | 60000          | 9100           | 1780                            |
| 6:1                           | -1                          | 60000          | 9200           | 1410                            |
| 8:1                           | -3                          | 56000          | 9000           | 1410                            |
| 10:1                          | -5                          | 54000          | 7700           | 1260                            |
| 12:1                          | -7                          | 39000          | 5600           | 950                             |
| 30:1                          | -25                         | 15000          | 2200           | 530                             |
| 50:1                          | -45                         | 7700           | 1300           | 380                             |



**Table S6.** Rheological properties of the hybrid hydrogels for the system GMP-L1-Isoniazid at GMP:L1 3:1 molar ratio in the absence and in the presence of different amounts of isoniazid.

| <b>GMP:L1<br/>Molar Ratio</b> | <b>Isoniazid<br/>(mg/mL)</b> | <b>G' (Pa)</b> | <b>G''(Pa)</b> | <b>γ (Pa)</b> |
|-------------------------------|------------------------------|----------------|----------------|---------------|
| <b>3:1</b>                    | <b>0</b>                     | 65000          | 7300           | 1190          |
| <b>3:1</b>                    | <b>1</b>                     | 46000          | 5300           | 1060          |
| <b>3:1</b>                    | <b>10</b>                    | 42000          | 4600           | 950           |

**Table S7.** Rheological properties of the hybrid hydrogels for the system GMP-L2-Isoniazid at GMP:L2 3:1 molar ratio in the absence and in the presence of different amounts of isoniazid.

| <b>GMP:L2<br/>Molar Ratio</b> | <b>Isoniazid<br/>(mg/mL)</b> | <b>G' (Pa)</b> | <b>G''(Pa)</b> | <b>γ (Pa)</b> |
|-------------------------------|------------------------------|----------------|----------------|---------------|
| <b>3:1</b>                    | <b>0</b>                     | 50000          | 6100           | 890           |
| <b>3:1</b>                    | <b>1</b>                     | 46000          | 5300           | 450           |
| <b>3:1</b>                    | <b>10</b>                    | -              | -              | -             |

**Table S8.** Rheological properties of the hybrid hydrogels for the system GMP-L3-Isoniazid at GMP:L3 4:1 molar ratio in the absence and in the presence of different amounts of isoniazid.

| <b>GMP:L3<br/>Molar Ratio</b> | <b>Isoniazid<br/>(mg/mL)</b> | <b>G' (Pa)</b> | <b>G''(Pa)</b> | <b>γ (Pa)</b> |
|-------------------------------|------------------------------|----------------|----------------|---------------|
| <b>4:1</b>                    | <b>0</b>                     | 49000          | 5400           | 1260          |
| <b>4:1</b>                    | <b>1</b>                     | 52000          | 5200           | 1260          |
| <b>4:1</b>                    | <b>10</b>                    | 18000          | 1700           | 790           |

**Table S9.** Rheological properties of the hybrid hydrogels for the system GMP-L5-Isoniazid at GMP:L5 5:1 molar ratio in the absence and in the presence of different amounts of isoniazid.

| <b>GMP:L5<br/>Molar Ratio</b> | <b>Isoniazid<br/>(mg/mL)</b> | <b>G' (Pa)</b> | <b>G''(Pa)</b> | <b><math>\gamma</math> (Pa)</b> |
|-------------------------------|------------------------------|----------------|----------------|---------------------------------|
| <b>5:1</b>                    | <b>0</b>                     | 60000          | 9100           | 1780                            |
| <b>5:1</b>                    | <b>1</b>                     | 52000          | 5200           | 1260                            |
| <b>5:1</b>                    | <b>10</b>                    | -              | -              | -                               |
